# Supplementary material for: Mechanistic switch leading to highly efficient chirality transfer in Pd(0)-catalyzed couplingâ€“cyclization of aryl iodides with 1âˆ¶1 acidâ€“base salts of 2,3-allenoic acids and l-(â€“)-cinchonidine or d-(+)-/l-(â€“)-Î±-methylbenzylamine. Enantioselective synthesis of highly optically active 3-aryl polysubstituted butenolidesElectronic supplementary information (ESI) available: experimental details. See http://www.rsc.org/suppdata/cc/b1/b109645a/
Source: Royal Society of Chemistry journal article supplement (doi:10.1039/b109645a), 2002-02-13
Supplement: b109645a.doc [file b109645a.doc]

**Supplementary data**

**Mechanistic Switch Leading to Highly Efficient Chirality Transfer in Pd(0)-Catalyzed Coupling-Cyclization of Aryl Iodides with 1:1 Acid-Base Salts of 2,3-Allenoic Acids and L-(-)-Cinchonidine or D-(+)-/L-(-)--Methylbenzylamine. Enantioselective Synthesis of 3-Aryl Polysubstituted Butenolides**

Shengming Ma* and Zhangjie Shi

Experimental section

**Starting Materials**. 2-Methyl-4-phenyl-2,3-butadienoic acid and 2-(*n*-propyl)-4-phenyl-2,3-butadienoic acid were prepared according to the published procedure[1] via the hydrolysis of their ethyl esters. 2,3-Undecadienoic acid was prepared according to a published procedure[2] via the reaction of CO2 with the corresponding 1,2-allenic lithiums, which, in turn, were prepared from the treatment of the corresponding 1,2-allenes with *n*-BuLi. Phenyl iodide, *p*-methylphenyl iodide, methyl, 4-iodobenzate,[3] and *n*-BuLi solution (1.6 M in hexanes), were commercially available and used without further purification. 1H NMR spectra were recorded using CDCl3 as the solvent and TMS as the internal standard. The ee%s were determined by HPLC with Chiralcel OD column (0.46 cmx 25 cm).

**General procedure A. The preparation of compounds (+)-3a.** Toa solution of 2-methyl-4-phenyl-2,3-butadienoic acid(70 mg, 0.4 mmol) and PhI (98 mg, 0.48 mmol) in 4 mL of toluene was added K2CO3 (66 mg, 0.48 mmol), TBAB (128 mg, 0.4 mmol) under Ar. After the addition, the mixture was cooled to -78 oC and Pd(PPh3)4 (23 mg, 5 mol%) was added quickly. The reaction mixture was degassed, purged with N2 and heated to 80 oC and stirred for 12.5 h. The mixture was purified directly via flash chromatography on silica gel (eluent: AcOEt : petroleum ether = 1 : 10) to afford a pale yellow oil of (+)-**3a**[4] (81 mg, yield 81%). 1H NMR (300 MHz, CDCl3)  7.12-7.38 (m, 10H), 6.16 (s, 1H), 2.14 (s, 3H); MS (EI, m/e): 250 (M+, 42.33), 145 (100); IR (neat) 1746, 1648, 1010 cm-1.

Compounds **(+)-3b-3e** were prepared similarly, compound (+)-**3f** was prepared according to ref. [5].

**(+)-3-Methyl-4-(4'-methylphenyl)-5-phenyl-2(5H)-furanone (3b).**  Starting from the corresponding 2,3-allenoic acid(70.0 mg , 0.4 mmol) and *p*-MeC6H4I ( 106 mg, 0.48 mmol) to afford a pale yellow oil of **3b** (71.0 mg, yield, 67%).  1H NMR (300 MHz, CDCl3)  7.19-7.35 (m, 9H), 6.17 (s, 1H), 2.34 (s, 3H), 2.15 (d, *J* = 1.7 Hz, 3H); MS (EI, m/e) 264 (M+, 44.76), 159 (100); IR (neat) 1746, 1650, 1610, 1092, 1030 cm-1; HRMS Calcd for C18H16O2: 264.1146, Found: 264.11403.

**(+)-4,5-Diphenyl-3-(*n*-propyl)-2(5H)-furanone (3c).** Starting from the corresponding 2,3-allenoic acid(80.8 mg , 0.4 mmol) and PhI (97.9 mg, 0.48 mmol) to afford a white solid of **3c** (58.5 mg, yield, 53%). Mp: 60-61 oC (*n*-hexane). 1H NMR (300 MHz, CDCl3)  7.11-7.39 (m, 10H), 6.16 (s, 1H), 2.45-2.53 (m, 2H), 1.66-1.80 (m, 2H), 1.00 (t, *J* = 7.3 Hz, 3H); MS (EI, m/e) 278 (M+, 71.55), 173 (100), 115 (99.13); IR (neat) 1746, 1648, 1098, 1010 cm-1; HRMS Calcd for C19H18O2: 278.1302, Found: 278.1292.

**(+)-3-(*n*-Propyl)-(4'-methylphenyl)-5-phenyl-2(5H)-furanone (3d).** Starting from the corresponding 2,3-allenoic acid(80.8 mg , 0.4 mmol) and *p*-MeC6H4I (104.6 mg, 0.48 mmol) to afford a white solid of **3d** (72 mg, yield 62%). Mp : 51-52 oC. (*n*-hexane). 1H NMR (300 MHz, CDCl3)  7.08-7.30 (m, 9H), 6.12 (s, 1H), 2.48-2.53 (m, 2H), 2.32 (s, 3H), 1.60-1.74 (m, 2H), 0.96 (t, *J* = 7.3 Hz, 3H); MS (EI, m/e) 292 (M+, 70.80), 187 (100); IR (neat) 1746, 1648, 1098, 1010 cm-1; HRMS Calcd for C20H20O2: 292.1458, Found: 292.1449.

**(+)-3-Methyl-4-(4'-methoxycarboxylphenyl)-5-phenyl-2(5H)-furanone (3e).** Starting from corresponding allenoic acid(70.0 mg, 0.4 mmol) and *p*-MeOOCC6H4I (125.8 mg, 0.48 mmol) to afford a pale yellow oil of **3e** (77.6 mg, yield 63%).  1H NMR (300 MHz, CDCl3)  7.92 (d, *J* = 8.3 Hz, 2H), 7.03-7.22 (m, 7H), 6.06 (s, 1H), 3.78 (s, 3H), 2.04 (s, 3H); MS (EI, M/e) 308 (M+, 69.26), 203 (100); IR (KBr) 1748, 1746, 1608, 1028cm-1; HRMS Calcd for C19H16O4: 308.1044, Found: 308.10438.

**(+)-4-Phenyl-5-(*n*-heptyl)-2(5H)-furanone (+)-3f.** Starting from the corresponding allenoic acid 182 mg (1 mmol) and phenyl iodide245 mg (1.2 mmol) in MeCN to afford (+)-**3f** (237 mg , 77%). 1H NMR (300 MHz, CDCl3) 7.40-7.50 (m, 5 H), 6.28 (d, *J* = 1.4 Hz, 1 H), 5.49 (d d d, *J* = 7.6, 2.7 and 1.4 Hz, 1 H), 1.95-2.03 (m, 1 H), 1.46-1.62 (m, 1 H), 1.10-1.35 (m, 10 H), 0.82 (t, *J* = 7.2 Hz, 3 H); MS (EI, *m/e*) 259 (M++1, 100); 258 (M+); IR (neat) 1735, 1615 cm-1; Anal. Calcd. for C17H22O2: C, 79.03; H, 8.53. Found: C, 78.66; H, 8.52.

**(+)-3-(*n*-Propyl)-4-phenyl-5-(4'-bromophenyl)-2(5H)-furanone (3g).** Starting from the corresponding 2,3-allenoic acid (141.0 mg , 0.5 mmol) and phenyl iodide (122.4 mg, 0.6 mmol) to afford a pale yellow solid of **3g** (136.1 mg, yield 75%). Mp : 145-146 oC (AcOEt/hexane).  1H NMR (300 MHz, CDCl3)  7.32-7.46 (m, 5H), 7.12-7.20 (m, 2H), 7.05 (d, *J* = 6.6 Hz, 2H), 6.09 (s, 1H), 2.40-2.52 (m, 2H), 1.73-1.52 (m, 2H), 0.95 (t, *J* = 7.4 Hz, 3H). Ms (EI, M/e) 356 (M+(79Br), 51.34); 358 (M+(81Br), 50.42), 173 (100); IR (KBr) 1738, 1654, 1490, 1028, 805, 702 cm-1; Anal. Calcd for C25H17BrO2: C, 63.88, H, 4.79. Found: C, 63.66, H, 4.99.

**General Procedure B.** A solution of (+)-**2a** (47.0 mg, 0.1 mmol, 97% ee) or(+)-**2c** (29.5 mg, 0.1 mmol, 97% ee) , PhI (25.0 mg, 0.12 mmol) and TBAB (32.2 mg, 0.1 mmol) in 3 mL of toluene were stirred and cooled to -20 oC. Then Pd2(dba)3.CHCl3 (6.4 mg, 5 mol%) and PPh3 (6.2mg, 20 mol%) were added quickly and the system was degassed and purged with N2. The reaction mixture was stirred at 5 oC for 48 h or 72 h. The mixture was purified directly via flash chromatography on silica gel (eluent: AcOEt : petroleum ether = 1 : 10) to afford a pale yellow oil,of S-(+)-**3a** (22.4 mg from (+)-**2a**, yield 90% (91% ee) or 15.0 mg from (+)-**2c**, yield 60% (93% ee)). 1H NMR (300 MHz, CDCl3)  7.12-7.38 (m, 10H), 6.16 (s, 1H), 2.16 (s, 3H).

Following compounds S-(+)-**3b**- S-(+)-**3g** were prepared similarly.

**S-(+)-3-Methyl-4-(4'-methylphenyl)-5-phenyl-2(5H)-furanone (S-(+)-3b).** Starting from (+)-**2a** (46.8 mg , 0.1 mmol, 97% ee) or (+)-**2c** (29.5 mg, 0.1 mmol, 97% ee) and PhI (25.0 mg, 0.12 mmol) to afford a pale yellow oil of S-(+)-**3b** (17.5 mg from Sa-(+)-**2a**, yield 66% (92% ee) or17.2 mg from Sa-(+)-**2c**, yield 65% (95% ee)). 1H NMR (300 MHz, CDCl3) 7.19-7.35 (m, 9H), 6.16 (s, 1H), 2.34 (s, 3H), 2.15 (d, *J* = 1.6 Hz, 3H);

**S-(+)-4,5-Diphenyl-3-(*n*-propyl)-2(5H)-furanone (S-(+)-3c).** Starting from Sa-(+)-**2b** (24.8 mg , 0.05 mmol, 98% ee) and PhI (12.6 mg, 0.06 mmol) to afford a white solid of S-(+)-**3c** (10.0 mg, yield 72% (91% ee)). Mp : 65-66 oC. 1H NMR (300 MHz, CDCl3)  7.11-7.39 (m, 10H), 6.16 (s, 1H), 2.45-2.56 (m, 2H), 1.64-1.80 (m, 2H), 1.00 (t, *J* = 7.3 Hz, 3H).

**S-(+)**-**3-(*n*-Propyl)-4-(4'-methylphenyl)-5-phenyl-2(5H)-furanone** **(S-(+)-3d).** Starting from Sa-(+)-**2b** (24.8 mg , 0.05 mmol, 98% ee) and *p*-MeC6H4I (13.1 mg, 0.06 mmol) to afford a white solid of S-(+)-**3d**, (11.0 mg, yield 75% (91% ee)). Mp : 52-53 oC. (*n*-hexane). 1H NMR (300 MHz, CDCl3)  7.08-7.30 (m, 9H), 6.12 (s, 1H), 2.48-2.53 (m, 2H), 2.32 (s, 3H), 1.60-1.74 (m, 2H), 0.98 (t, *J* = 7.4 Hz, 3H);

**R-(-)**-**4,5-Diphenyl-3-methyl-2(5H)-furanone** **(R-(-)-3a).** Starting from **Ra-**(-)-**2c** (29.5 mg , 0.1 mmol, 98% ee) and PhI ( 25.0 mg, 0.12 mmol) to afford a pale yellow oil of R-(-)-**3a** (16.5 mg, yield 66% (96% ee)). 1H NMR (300 MHz, CDCl3)  7.08-7.40 (m, 10H), 6.16 (s, 1H), 2.14 (s, 3H).

**R-(-)**-**3-Methyl-4-(4'-methylphenyl)-5-phenyl-2(5H)-furanone** **(R-(-)-3b).** Starting from Ra-(-)-**2c** (29.5 mg , 0.1 mmol, 98% ee) and *p*-MePhI ( 26.2 mg, 0.12 mmol) to afford a pale yellow oil of R-(-)-**3b** (19.0 mg, yield 72% (98% ee)). 1H NMR (300 MHz, CDCl3) 7.19-7.35 (m, 9H), 6.16 (s, 1H), 2.34 (s, 3H), 2.14 (d, *J* = 1.7 Hz, 3H);.

**R-(-)**-**3-Methyl-4-(4'-methoxycarbonylphenyl)-5-phenyl-2(5H)-furanone** **(R-(-)-3e).** Starting from Ra-(-)-**2c** (29.5 mg , 0.1 mmol, 98% ee) and *p*-MeO2CC6H4I (31.5 mg, 0.12 mmol) to afford a white solid of R-(-)-**3e** (17.9 mg, yield 58% (94% ee)). mp: 43.5-45 oC,  1H NMR (300 MHz, CDCl3)  7.92 (d, *J* = 8.3 Hz, 2H), 7.03-7.22 (m, 7H), 6.06 (s, 1H), 3.78 (s, 3H), 2.04 (s, 3H);

(+)-**4-Phenyl-5-(*n*-heptyl)-2(5H)-furanone ((+)-3f).** Starting from (+)-**2d** ( 23.8 mg , 0.05 mmol, 97% ee) and PhI ( 12.6 mg, 0.06 mmol) in 3 mL of CH3CN to afford a pale yellow oil of (+)-**3f** (7.1 mg, yield 55% (94% ee)). 1H NMR (300 MHz, CDCl3)7.40-7.50 (m, 5 H), 6.28 (d, *J* = 1.4 Hz, 1 H), 5.49 (d d d, *J* = 7.6, 2.7 and 1.4 Hz, 1 H), 1.95-2.03 (m, 1 H), 1.46-1.62 (m, 1 H), 1.10-1.35 (m, 10 H), 0.82 (t, *J* = 7.2 Hz, 3 H).

S-(+)-**3-(*n*-Propyl)-4-phenyl-5-(4'-bromophenyl)-2(5H)-furanone** **(S-(+)-3g).** Starting from Sa-(+)-**2f** (57.5 mg , 0.1 mmol, 99% ee) and phenyl iodide (24.5 mg, 0.12 mmol) to afford a pale yellow solid of S-(+)-**3g** (27.1 mg, yield 76% (94% ee)). Mp : 151-152 oC (CH2Cl2/hexane)  1H NMR (300 MHz, CDCl3)  7.32-7.46 (m, 5H), 7.12-7.20 (m, 2H), 7.05 (d, *J* = 6.6 Hz, 2H), 6.09 (s, 1H), 2.40-2.52 (m, 2H), 1.73-1.52 (m, 2H), 0.95 (t, *J* = 7.4 Hz, 3H).

**References:**

1. H. J. Bestmann, H. Hartung. *Chem. Ber.* **1966**, *99*, 1198.
2. H. D. Venkruijsse, L. Brandsma, *Synthesis of Acetylenes, Allenes annd Cumulenes. A Laboratory Manual;* Elsevier: Amsterdam, The Netherlands, **1981**; p33.
3. S. S. Wang, B. F. Gisin, D. P.; Wihter, R. Makofske, I. D. Kulesha, C. Tzougrak, J. Meinhofer, *J. Org. Chem*. **1977**, *42*, 1286.
4. J. Delaunay, A. Orliac-Le Moing, J. Simonet, *Tetrahedron*, **1988**, *44(23)*, 7089.
5. S. Ma, Z. Shi, *J. Org. Chem.* **1998**, *63*, 6387.
